# Supplementary material
Source: PubMed Central journal article supplement (PMC7346311)

**Supplementary Figure 1:** Average non-HDL cholesterol levels over time for subgroups of participants clustered according to group-based model estimation (participants with non-missing data over entire follow-up, N=1258).

## Non-HDL trajectory over time

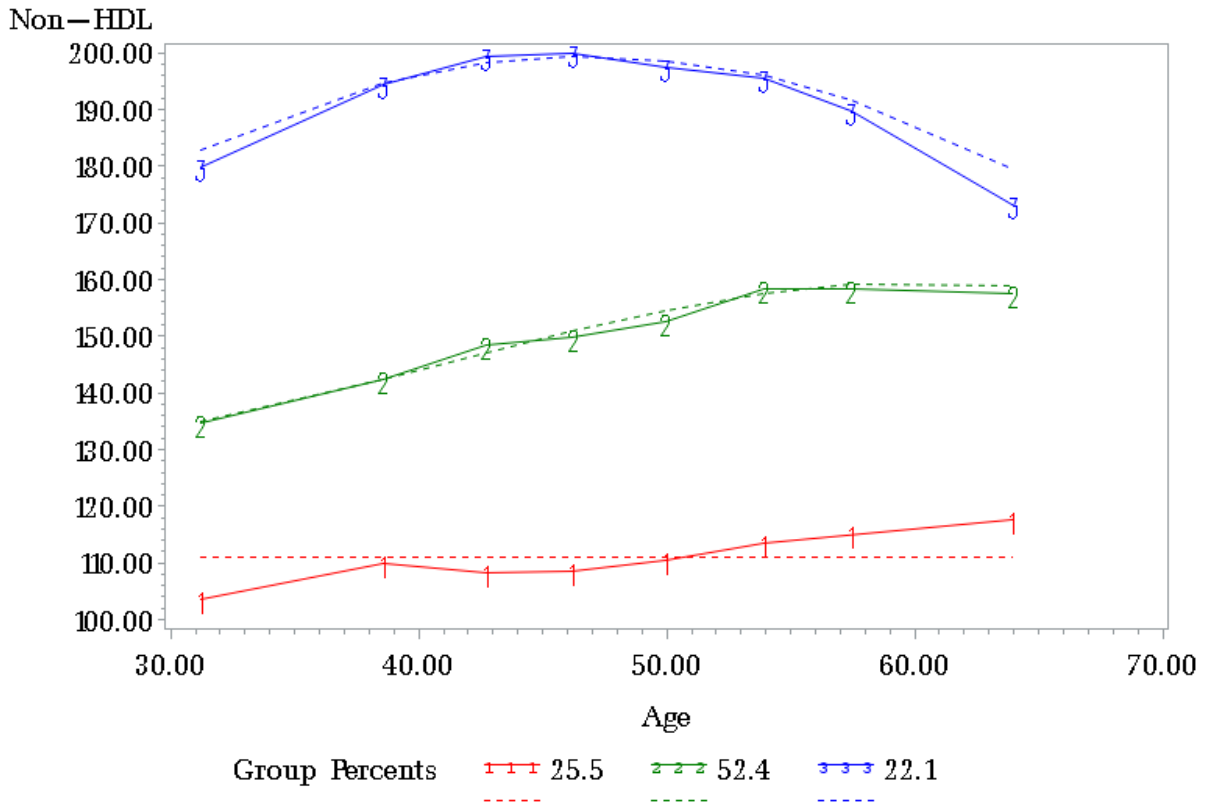

Supplement: NIHMS1597595-supplement-1.pdf [file NIHMS1597595-supplement-1.pdf]
